# Supplementary material
Source: MDPI journal article supplement (https://www.mdpi.com/2076-3417/10/5/1559)
Supplement: s1 [file s1]

# Three-Dimensional Characterization of Peripapillary Retinal Pigment Epithelium-Basement Membrane Layer in Patients following Lumbar Puncture

Junfei Tong <sup>1,†</sup>, Pengfei Dong <sup>1,2,†</sup>, Sachin Kedar <sup>3,4</sup>, Deepta Ghate <sup>4</sup> and Linxia Gu <sup>1,2,\*</sup>

<sup>1</sup> Department of Mechanical and Materials Engineering, University of Nebraska-Lincoln, Lincoln, NE 68588-0656, USA; tongjunfei094@gmail.com (J.T.); pengfeidong0415@gmail.com (P.D.)

<sup>2</sup> Department of Biomedical and Chemical Engineering, Florida Institute of Technology, Melbourne, FL32901, USA

<sup>3</sup> Department of Neurological Sciences, University of Nebraska Medical Center, Omaha, NE 68198-8440, USA; sachin.kedar@unmc.edu

<sup>4</sup> Stanley M. Truhlsen Eye Institute, University of Nebraska Medical Center, Omaha, NE 68105-1119, USA; dghate@unmc.edu

\* Correspondence: gul@fit.edu; Tel.: +1-321-674-8447

† Both authors contributed equally to this paper.

Received: 18 January 2020; Accepted: 19 February 2020; Published: date

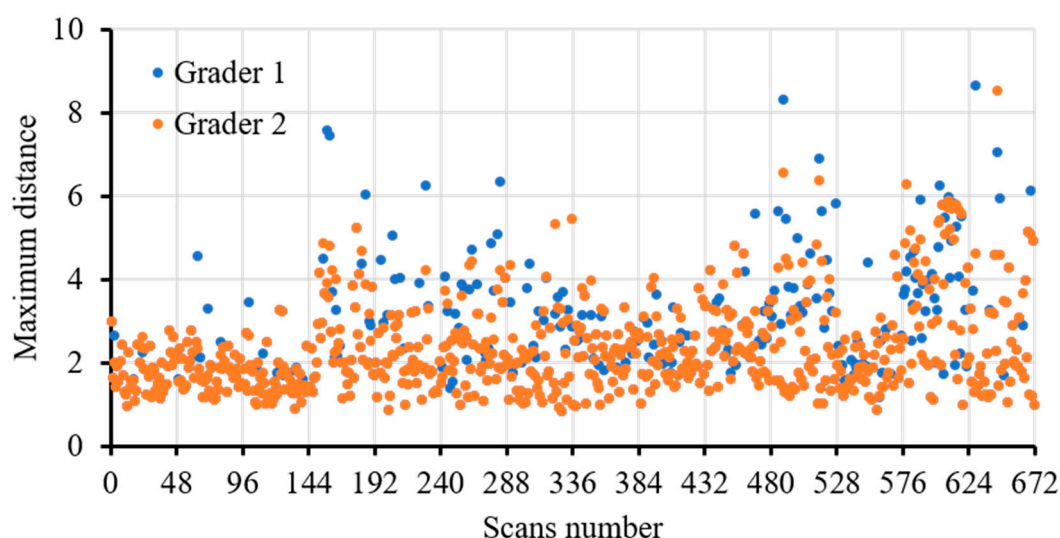

**Figure S1.** The Dmax in the 672 scans from the 14 left eyes accessed by two graders.

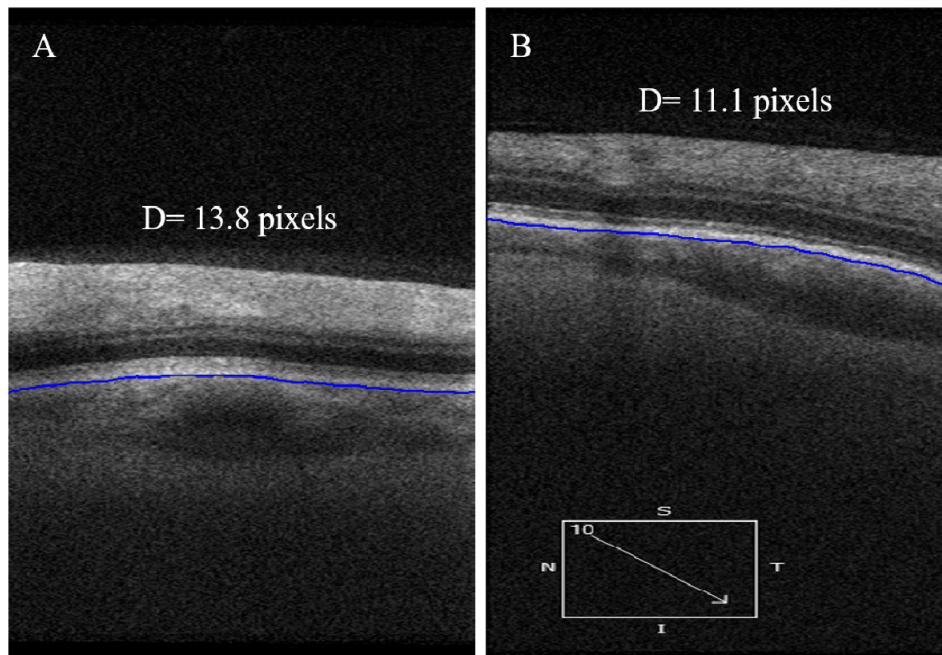

Left eye from patient 07

Left eye from patient 12

**Figure S2.** Two excluded eyes due to non-straight ppRPE/BM layer with  $D$  larger than 10 pixels.
